# Supplementary figures and images for: The Outer Surface Lipoprotein VolA Mediates Utilization of Exogenous Lipids by Vibrio cholerae
Source: PubMed Central journal article supplement — mBio. 2013 May 14;4(3):e00305-13. doi: 10.1128/mBio.00305-13 (PMC3656444; doi:10.1128/mbio.00305-13), 2013-05-14

**A**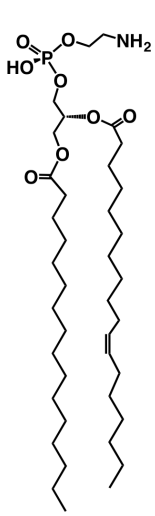**PE**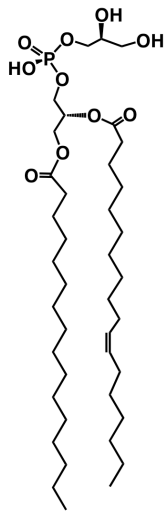**PG**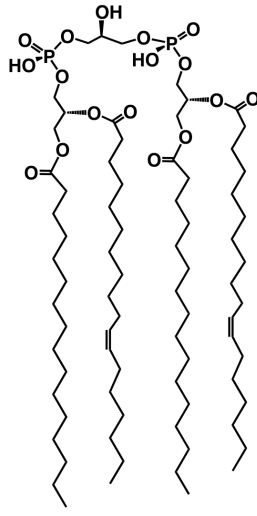**CL****B**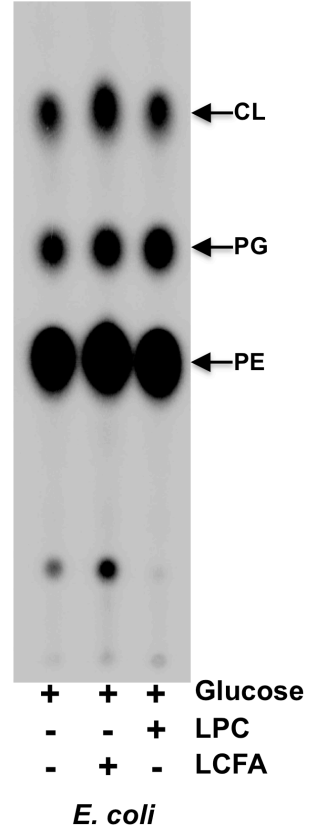

Supplement: mbo003131522so1.pdf [file mbo003131522so1.pdf]

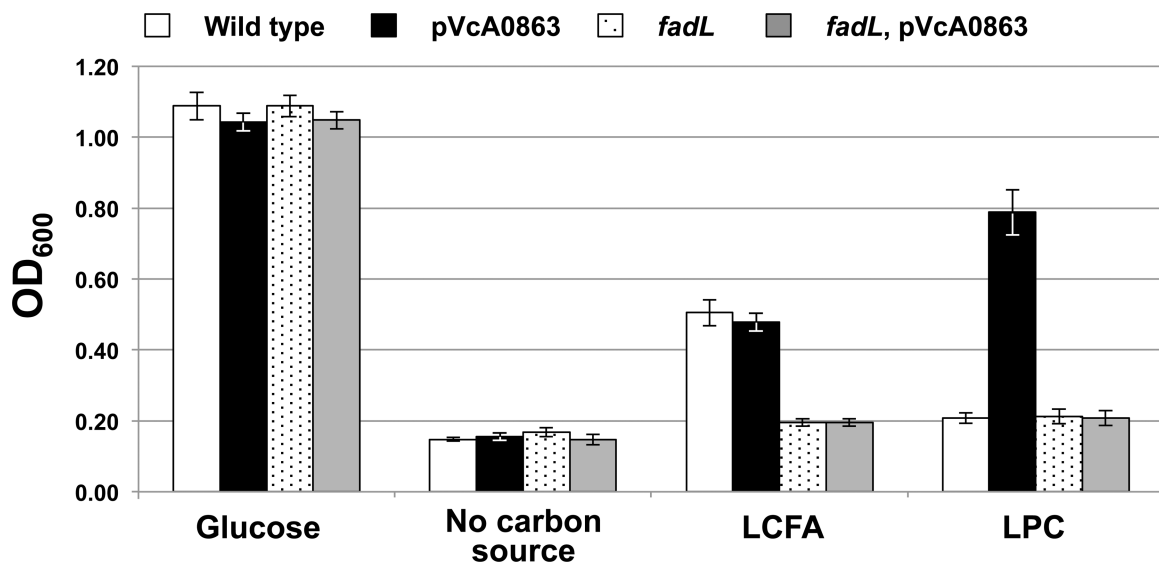

Supplement: mbo003131522so10.pdf [file mbo003131522so10.pdf]

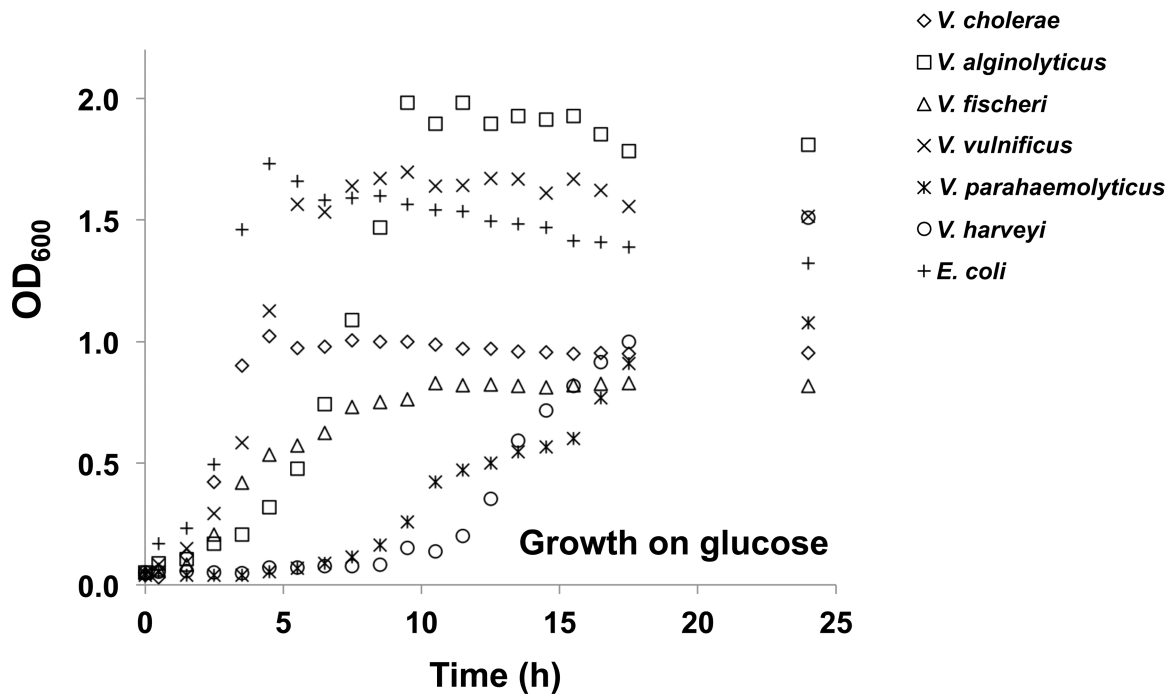

Supplement: mbo003131522so2.pdf [file mbo003131522so2.pdf]

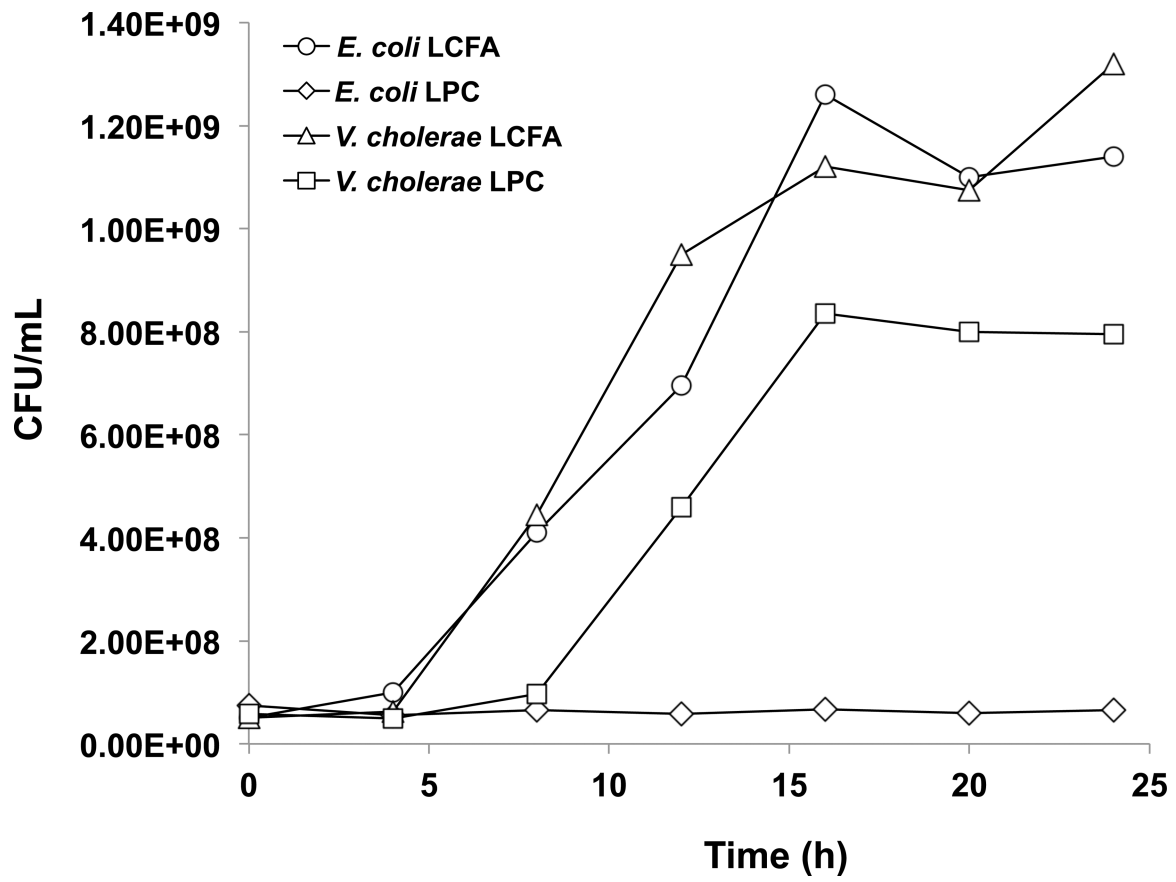

Supplement: mbo003131522so3.pdf [file mbo003131522so3.pdf]

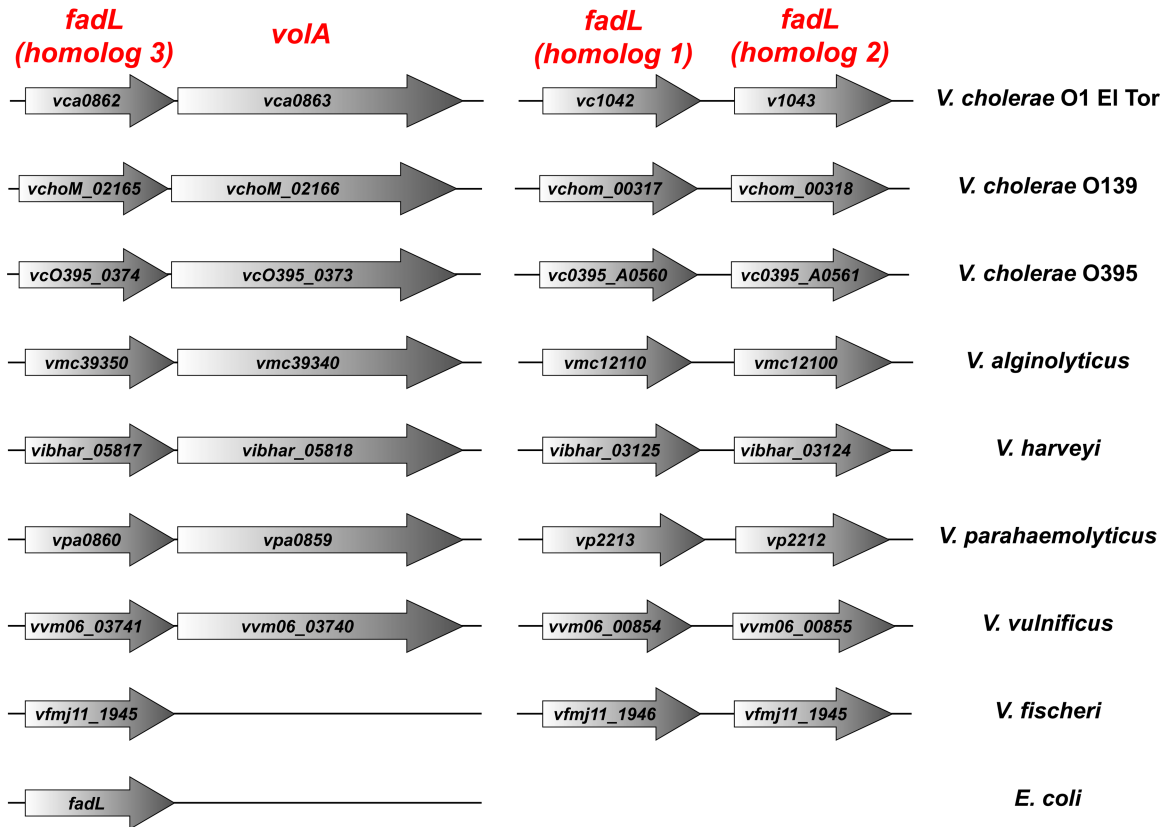

Supplement: mbo003131522so6.pdf [file mbo003131522so6.pdf]

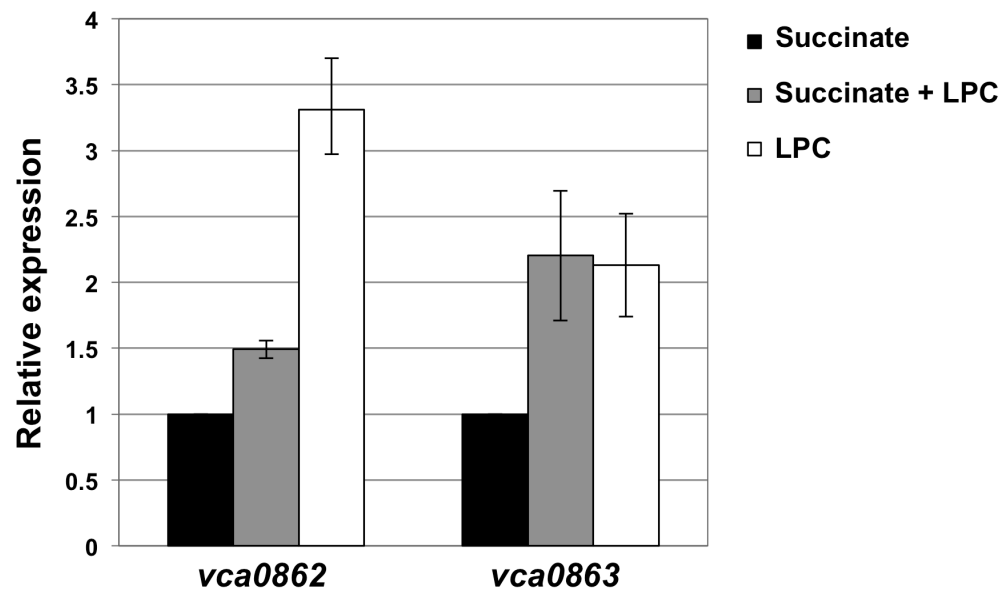

Supplement: mbo003131522so7.pdf [file mbo003131522so7.pdf]

# Mass spectrometry of PE species

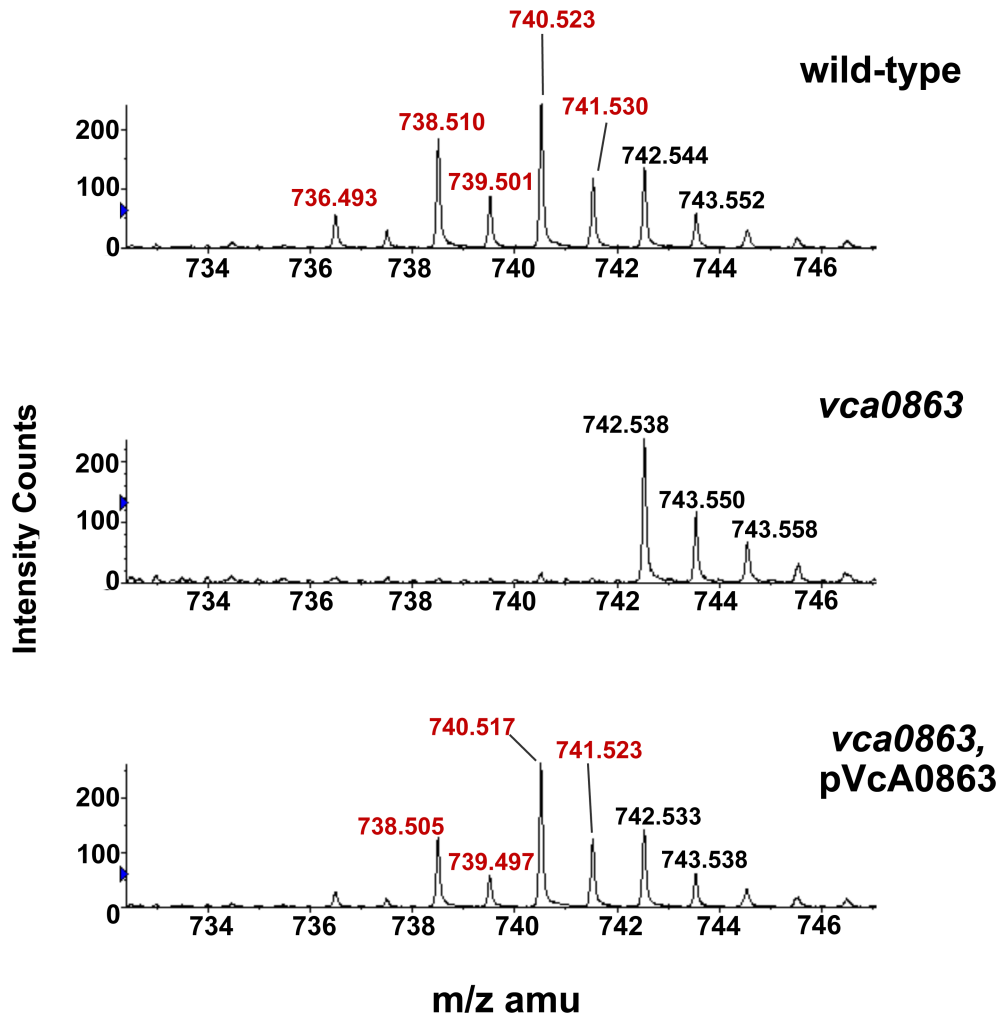

Supplement: mbo003131522so8.pdf [file mbo003131522so8.pdf]

# Mass spectrometry of CL species

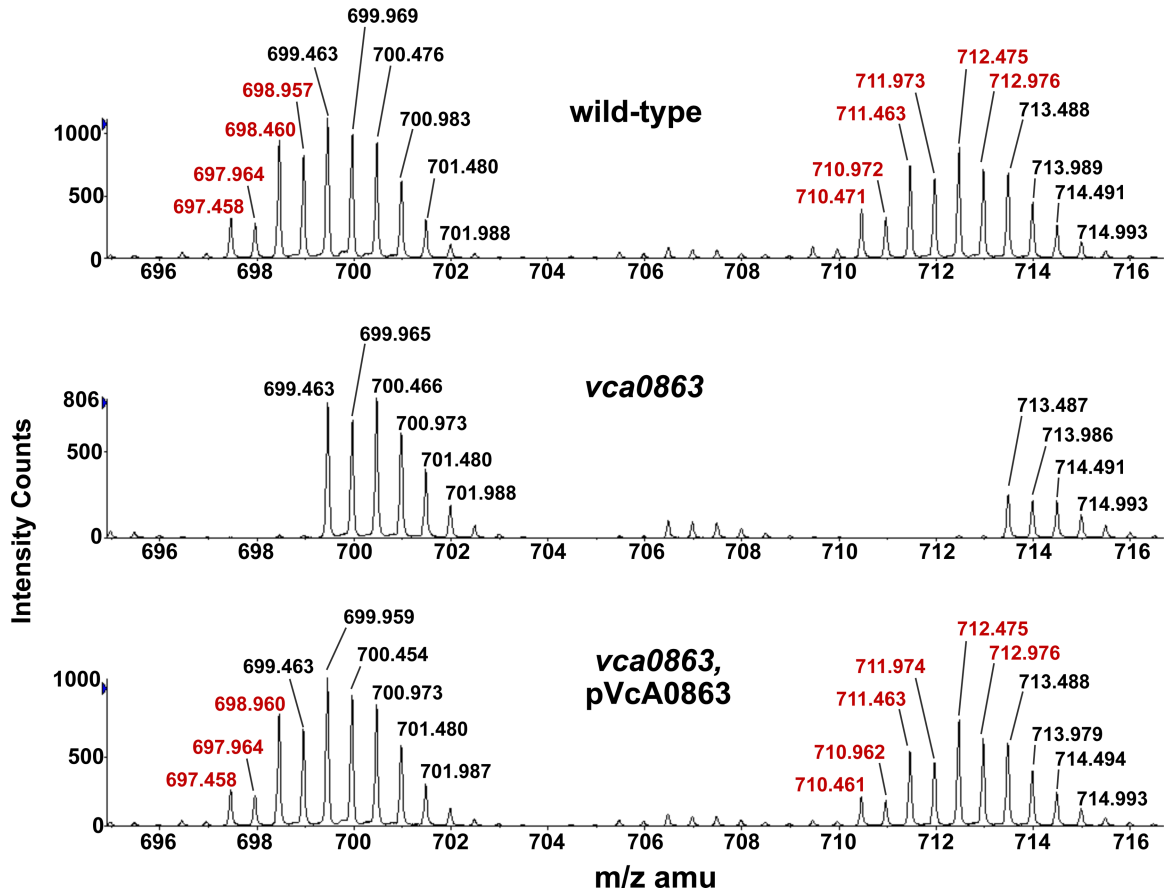

Supplement: mbo003131522so9.pdf [file mbo003131522so9.pdf]
